# Supplementary material for: Does antiretroviral therapy initiation increase sexual risk taking in Kenyan female sex workers? A retrospective case–control study
Source: PubMed Central journal article supplement — BMJ Open. 2012 Apr 1;2(2):e000565. doi: 10.1136/bmjopen-2011-000565 (PMC3323809; doi:10.1136/bmjopen-2011-000565), 2012-04-01
Supplement: bmjopen-2011-000565.draft_revisions.pdf [file bmjopen-2011-000565.draft_revisions.pdf]

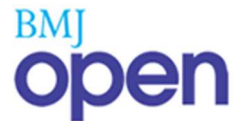

**Antiretroviral therapy initiation in Kenyan female sex workers is not associated with increased sexual risk taking**

|                                 |                                                                                                                                                                                                                                                                                                                                                                                                                                                                                                                                                                                                                                                                                                                                                                                                                                                                                                                                |
|---------------------------------|--------------------------------------------------------------------------------------------------------------------------------------------------------------------------------------------------------------------------------------------------------------------------------------------------------------------------------------------------------------------------------------------------------------------------------------------------------------------------------------------------------------------------------------------------------------------------------------------------------------------------------------------------------------------------------------------------------------------------------------------------------------------------------------------------------------------------------------------------------------------------------------------------------------------------------|
| Journal:                        | <i>BMJ Open</i>                                                                                                                                                                                                                                                                                                                                                                                                                                                                                                                                                                                                                                                                                                                                                                                                                                                                                                                |
| Manuscript ID:                  | bmjopen-2011-000565                                                                                                                                                                                                                                                                                                                                                                                                                                                                                                                                                                                                                                                                                                                                                                                                                                                                                                            |
| Article Type:                   | Research                                                                                                                                                                                                                                                                                                                                                                                                                                                                                                                                                                                                                                                                                                                                                                                                                                                                                                                       |
| Date Submitted by the Author:   | 04-Nov-2011                                                                                                                                                                                                                                                                                                                                                                                                                                                                                                                                                                                                                                                                                                                                                                                                                                                                                                                    |
| Complete List of Authors:       | Mawji, Elysha; University of Toronto, Medicine<br>McKinnon, Lyle; University of Toronto, Clinical Science Division; University of Nairobi, Medical Microbiology<br>Wachihi, Charles; University of Nairobi, Medical Microbiology<br>Chege, Duncan; University of Toronto, Medicine<br>Thottingal, Paul; University of Nairobi, Medical Microbiology<br>Kariri, Anthony; University of Nairobi, Medical Microbiology<br>Plummer, Francis; University of Manitoba, Medical Microbiology<br>Ball, T.; University of Manitoba, Medical Microbiology<br>Jaoko, Walter; University of Nairobi, Medical Microbiology<br>Ngugi, Elizabeth; University of Nairobi, Community Health<br>Kimani, Joshua; University of Nairobi, Medical Microbiology<br>Gelmon, Lawrence; University of Manitoba, Medical Microbiology<br>Nagelkerke, Nico; University of Manitoba, Medical Microbiology<br>Kaul, Rupert; University of Toronto, Medicine |
| <b>Primary Subject Heading</b>: | Infectious diseases                                                                                                                                                                                                                                                                                                                                                                                                                                                                                                                                                                                                                                                                                                                                                                                                                                                                                                            |
| Secondary Subject Heading:      | Epidemiology, Global health                                                                                                                                                                                                                                                                                                                                                                                                                                                                                                                                                                                                                                                                                                                                                                                                                                                                                                    |
| Keywords:                       | EPIDEMIOLOGY, HIV & AIDS < INFECTIOUS DISEASES, Public health < INFECTIOUS DISEASES                                                                                                                                                                                                                                                                                                                                                                                                                                                                                                                                                                                                                                                                                                                                                                                                                                            |
|                                 |                                                                                                                                                                                                                                                                                                                                                                                                                                                                                                                                                                                                                                                                                                                                                                                                                                                                                                                                |

SCHOLARONE™  
Manuscripts

**STROBE 2007 (v4) checklist of items to be included in reports of observational studies in epidemiology\***  
**Checklist for cohort, case-control, and cross-sectional studies (combined)**

| Section/Topic             | Item # | Recommendation                                                                                                                                                                                                                                                                                                                                                                                                                                                         | Reported on page # |
|---------------------------|--------|------------------------------------------------------------------------------------------------------------------------------------------------------------------------------------------------------------------------------------------------------------------------------------------------------------------------------------------------------------------------------------------------------------------------------------------------------------------------|--------------------|
| Title and abstract        | 1      | (a) Indicate the study’s design with a commonly used term in the title or the abstract                                                                                                                                                                                                                                                                                                                                                                                 | 1                  |
|                           |        | (b) Provide in the abstract an informative and balanced summary of what was done and what was found                                                                                                                                                                                                                                                                                                                                                                    | 4                  |
| <b>Introduction</b>       |        |                                                                                                                                                                                                                                                                                                                                                                                                                                                                        |                    |
| Background/rationale      | 2      | Explain the scientific background and rationale for the investigation being reported                                                                                                                                                                                                                                                                                                                                                                                   | 5                  |
| Objectives                | 3      | State specific objectives, including any pre-specified hypotheses                                                                                                                                                                                                                                                                                                                                                                                                      | 5                  |
| <b>Methods</b>            |        |                                                                                                                                                                                                                                                                                                                                                                                                                                                                        |                    |
| Study design              | 4      | Present key elements of study design early in the paper                                                                                                                                                                                                                                                                                                                                                                                                                | 5-6                |
| Setting                   | 5      | Describe the setting, locations, and relevant dates, including periods of recruitment, exposure, follow-up, and data collection                                                                                                                                                                                                                                                                                                                                        | 6                  |
| Participants              | 6      | (a) <i>Cohort study</i> —Give the eligibility criteria, and the sources and methods of selection of participants. Describe methods of follow-up<br><i>Case-control study</i> —Give the eligibility criteria, and the sources and methods of case ascertainment and control selection. Give the rationale for the choice of cases and controls<br><i>Cross-sectional study</i> —Give the eligibility criteria, and the sources and methods of selection of participants | 6                  |
|                           |        | (b) <i>Cohort study</i> —For matched studies, give matching criteria and number of exposed and unexposed<br><i>Case-control study</i> —For matched studies, give matching criteria and the number of controls per case                                                                                                                                                                                                                                                 |                    |
| Variables                 | 7      | Clearly define all outcomes, exposures, predictors, potential confounders, and effect modifiers. Give diagnostic criteria, if applicable                                                                                                                                                                                                                                                                                                                               | 6                  |
| Data sources/ measurement | 8*     | For each variable of interest, give sources of data and details of methods of assessment (measurement). Describe comparability of assessment methods if there is more than one group                                                                                                                                                                                                                                                                                   | 6-7                |
| Bias                      | 9      | Describe any efforts to address potential sources of bias                                                                                                                                                                                                                                                                                                                                                                                                              | 7-8                |
| Study size                | 10     | Explain how the study size was arrived at                                                                                                                                                                                                                                                                                                                                                                                                                              | 6                  |
| Quantitative variables    | 11     | Explain how quantitative variables were handled in the analyses. If applicable, describe which groupings were chosen and why                                                                                                                                                                                                                                                                                                                                           | 6-7                |
| Statistical methods       | 12     | (a) Describe all statistical methods, including those used to control for confounding                                                                                                                                                                                                                                                                                                                                                                                  | 6                  |
|                           |        | (b) Describe any methods used to examine subgroups and interactions                                                                                                                                                                                                                                                                                                                                                                                                    | n/a                |
|                           |        | (c) Explain how missing data were addressed                                                                                                                                                                                                                                                                                                                                                                                                                            | n/a                |
|                           |        | (d) <i>Cohort study</i> —If applicable, explain how loss to follow-up was addressed<br><i>Case-control study</i> —If applicable, explain how matching of cases and controls was addressed                                                                                                                                                                                                                                                                              | n/a                |

|                          |     |                                                                                                                                                                                                              |     |
|--------------------------|-----|--------------------------------------------------------------------------------------------------------------------------------------------------------------------------------------------------------------|-----|
|                          |     | <i>Cross-sectional study</i> —If applicable, describe analytical methods taking account of sampling strategy                                                                                                 |     |
|                          |     | (e) Describe any sensitivity analyses                                                                                                                                                                        | n/a |
| <b>Results</b>           |     |                                                                                                                                                                                                              |     |
| Participants             | 13* | (a) Report numbers of individuals at each stage of study—eg numbers potentially eligible, examined for eligibility, confirmed eligible, included in the study, completing follow-up, and analysed            | 6   |
|                          |     | (b) Give reasons for non-participation at each stage                                                                                                                                                         | n/a |
|                          |     | (c) Consider use of a flow diagram                                                                                                                                                                           | n/a |
| Descriptive data         | 14* | (a) Give characteristics of study participants (eg demographic, clinical, social) and information on exposures and potential confounders                                                                     | 6   |
|                          |     | (b) Indicate number of participants with missing data for each variable of interest                                                                                                                          | 6   |
|                          |     | (c) <i>Cohort study</i> —Summarise follow-up time (eg, average and total amount)                                                                                                                             | 6   |
| Outcome data             | 15* | <i>Cohort study</i> —Report numbers of outcome events or summary measures over time                                                                                                                          |     |
|                          |     | <i>Case-control study</i> —Report numbers in each exposure category, or summary measures of exposure                                                                                                         | 6-7 |
|                          |     | <i>Cross-sectional study</i> —Report numbers of outcome events or summary measures                                                                                                                           |     |
| Main results             | 16  | (a) Give unadjusted estimates and, if applicable, confounder-adjusted estimates and their precision (eg, 95% confidence interval). Make clear which confounders were adjusted for and why they were included | 6-7 |
|                          |     | (b) Report category boundaries when continuous variables were categorized                                                                                                                                    |     |
|                          |     | (c) If relevant, consider translating estimates of relative risk into absolute risk for a meaningful time period                                                                                             |     |
| Other analyses           | 17  | Report other analyses done—eg analyses of subgroups and interactions, and sensitivity analyses                                                                                                               | n/a |
| <b>Discussion</b>        |     |                                                                                                                                                                                                              |     |
| Key results              | 18  | Summarise key results with reference to study objectives                                                                                                                                                     | 7-8 |
| Limitations              | 19  | Discuss limitations of the study, taking into account sources of potential bias or imprecision. Discuss both direction and magnitude of any potential bias                                                   | 7-8 |
| Interpretation           | 20  | Give a cautious overall interpretation of results considering objectives, limitations, multiplicity of analyses, results from similar studies, and other relevant evidence                                   | 7-8 |
| Generalisability         | 21  | Discuss the generalisability (external validity) of the study results                                                                                                                                        | 7-8 |
| <b>Other information</b> |     |                                                                                                                                                                                                              |     |
| Funding                  | 22  | Give the source of funding and the role of the funders for the present study and, if applicable, for the original study on which the present article is based                                                | 2   |

\*Give information separately for cases and controls in case-control studies and, if applicable, for exposed and unexposed groups in cohort and cross-sectional studies.

**Note:** An Explanation and Elaboration article discusses each checklist item and gives methodological background and published examples of transparent reporting. The STROBE checklist is best used in conjunction with this article (freely available on the Web sites of PLoS Medicine at <http://www.plosmedicine.org/>, Annals of Internal Medicine at <http://www.annals.org/>, and Epidemiology at <http://www.epidem.com/>). Information on the STROBE Initiative is available at [www.strobe-statement.org](http://www.strobe-statement.org).

Mawji E et al.

ART and sexual risk behaviour in sex workers.

**Antiretroviral therapy initiation in Kenyan female sex workers is not associated with increased sexual risk taking in a retrospective case-control study.**

Elysha Mawji,<sup>1\*</sup> Lyle R. McKinnon,<sup>1,2\*</sup> Charles Wachihi,<sup>2</sup> Duncan Chege,<sup>1</sup> Paul Thottingal,<sup>2</sup> Anthony Kariri,<sup>2</sup> Francis A. Plummer,<sup>3,4</sup> T. Blake Ball,<sup>3,4</sup> Walter Jaoko,<sup>2</sup> Elizabeth N. Ngugi,<sup>2</sup> Joshua Kimani,<sup>2,3</sup> Lawrence Gelmon,<sup>3</sup> Nico Nagelkerke,<sup>3,5</sup> Rupert Kaul<sup>1,2,6</sup>

<sup>1</sup> Department of Medicine, University of Toronto, Canada

<sup>2</sup> Departments of Medical Microbiology (LRM, CW, AK, WJ, JK, RK) and Community Health (EN), University of Nairobi, Nairobi, Kenya

<sup>3</sup> Department of Medical Microbiology, University of Manitoba, Winnipeg, Canada

<sup>4</sup> National Microbiology Lab, Public Health Agency of Canada, Winnipeg, Manitoba, Canada

<sup>5</sup> Department of Community Medicine, United Arab Emirates University, Al Ain, UAE

<sup>6</sup> Department of Medicine, University Health Network, Toronto, Canada

\* These authors contributed equally to this work

Correspondence to: Dr. Rupert Kaul  
Clinical Science Division, University of Toronto  
Medical Sciences Building #6356  
Toronto, Ontario, Canada, M5S 1A8  
Tel: (1-416) 978-8607; Fax: (1-416) 978-8765  
E-mail: [rupert.kaul@utoronto.ca](mailto:rupert.kaul@utoronto.ca)

OR

Dr. Lyle McKinnon

Mawji E et al.

ART and sexual risk behaviour in sex workers.

Clinical Science Division, University of Toronto  
Medical Sciences Building #6356  
Toronto, Ontario, Canada, M5S 1A8  
Tel: +254 723 430 009  
E-mail: [sjuisijali@gmail.com](mailto:sjuisijali@gmail.com)

Word count: Abstract: 108

Text: 1029

**Conflicts of interest:** The authors do not have a commercial or other association that might pose a conflict of interest.

**Author contributions:** EM, PT, WJ, JK, LG, and RK designed the study. EM, LRM, AK, NN, and RK analyzed the data. CW and JK managed the clinical cohorts. All authors contributed to the writing and editing of the manuscript.

**Financial support:** This research was supported by grants from the Canadian Institutes of Health Research (RK; HET-85518 and MOP-89983); patient care activities and the purchase of antiretroviral drugs were funded by the President's Emergency Plan for AIDS Relief (PEPFAR). Salary support was provided by the Canadian Institutes of Health Research and the International Infectious Diseases and Global Health Training Program (LM), and the Canada Research Chair Program (RK).

**Data sharing statement:** There are no additional data available.

Mawji E et al.

ART and sexual risk behaviour in sex workers.

## ARTICLE SUMMARY

### *Article Focus:*

- Impact of starting antiretroviral therapy (ART) on sexual risk-taking behaviour in female sex workers (FSW), an important potential source of onward HIV transmission.

### *Key Messages:*

- ART initiation was not associated with increased risk taking or STI incidence.
- Both of these declined over time, most likely as a result of risk reduction counseling.

### *Strengths and Limitations:*

- Strengths include a relevant population, longitudinal follow-up, and inclusion of biological measures of risk-taking (STI incidence).
- Limitations include relatively small study groups and limited sampling time points.

Mawji E et al.

ART and sexual risk behaviour in sex workers.

## ABSTRACT

*Objectives:* Although antiretroviral therapy (ART) prolongs life and reduces infectiousness, in some contexts it has been associated with increased sexual risk taking.

*Design:* Retrospective case-control study.

*Setting:* Nairobi-based dedicated female sex worker (FSW) clinic.

*Participants:* HIV-infected FSW before and after ART initiation (n=62); HIV-infected and uninfected control FSWs not starting ART during the same follow-up period (n=40).

*Intervention:* Initiation of ART.

*Primary outcome measures:* Self-reported condom use, client numbers, and STI incidence over the study period (before and after ART initiation in cases).

*Results:* Sexual risk-taking behaviour with casual clients did not increase after ART initiation; condom use increased and STI incidence decreased in both cases and controls, likely due to successful cohort-wide HIV prevention efforts.

*Conclusions:* ART provision was not associated with increases in unsafe sex in this core transmission group.

Mawji E et al.

ART and sexual risk behaviour in sex workers.

## MAIN TEXT

ART provision may have dichotomous effects on HIV transmission. While ART reduces blood and genital tract viral load, and therefore infectiousness(1), it has also been associated with reduced safe sex practices(2-4) and increases in STI incidence(5). Although this has not been the experience to date in resource-poor countries(6), it could become an issue as access expands(7), and merits further study. Models suggest that if safe sex practices are not maintained, then HIV transmission may increase despite ART-associated reductions in genital tract virus levels(8). A recent study in Kenyan sex workers with relatively low rates of partner exchange showed no change in risk-taking following ART(9), but these findings need to be confirmed in a high partner exchange setting.

Female sex workers (FSWs) play a key role in HIV epidemic spread in sub-Saharan Africa(10) during both early and late epidemic phases(7) due to multiple partners, high rates of HIV and sexually transmitted infections (STIs), and an inability to negotiate safer sex practices(10-12). HIV prevention in this group may be the highest impact intervention in developing countries(13). Therefore, ART programs targeting FSW may not only preserve life, but also reduce HIV transmission at a population level. However, it will be critical to ensure that sexual disinhibition does not counteract these beneficial effects.

We assessed the impact of ART on sexual behaviour within an established cohort of FSWs from Nairobi, Kenya in a retrospective case-control study. Institutional Review Boards at Kenyatta National Hospital, and the Universities of Manitoba and Toronto approved the study, and all participants gave written, informed consent prior to participation. Each participant completed a



Mawji E et al.

*ART and sexual risk behaviour in sex workers.*

standardized questionnaire and physical exam every six months. Self-reported risk-taking data included the number of clients (casual and regular) and condoms used per week. Percentage condom use with casual clients was calculated from reported client and condom numbers, with maximum usage arbitrarily set at 98%. Risk reduction services provided to all participants included peer and clinic-based counseling, provision of free condoms, and STI management according to Kenyan guidelines. Non-parametric statistical comparisons between groups and within an individual were performed using PASWStatistics 18.0.

All HIV-infected FSWs initiating ART during 2001-2006 with  $\geq 1$  year of follow-up were included as cases (n=62). Since sexual risk-taking may change over time in the cohort as a whole, HIV-infected ART-naïve and HIV-uninfected FSWs enrolled in the cohort for a similar duration were selected as controls (n=20 each). Cases and controls were generally comparable at baseline, but cases reported higher condom use with casual clients (mean 97.8% vs. 95.7%; p=0.01) and had a trend to a lower number of unprotected sex acts over the past year (23.0 vs. 34.1; p=0.14, Table 1). The proportion of participants reporting a regular client was similar (cases 58% vs. controls 65%; p=0.62), and condoms were rarely used with regular clients (cases 23.2% vs. controls 9.6%; p=0.13).

No significant change in casual client numbers was seen during the year after starting ART in cases (19.9/week pre- vs. 21.9 post-ART; p=0.17), in condom use with casual clients (97.8% both pre- and post-ART; p=0.66), or in the number of unprotected sex acts with casual clients (23.7/year pre- vs. 24.7 post-ART; p=0.26). Condom use increased in controls (mean 95.7% vs. 97.6%; p=0.14), so that although casual client numbers increased over the study period from 19.4

Mawji E et al.

ART and sexual risk behaviour in sex workers.

to 24.5 per week ( $p=0.002$ ), there was a trend to reduced unprotected sex acts with casual clients during the latter year (34.1 vs. 29.5;  $p=0.10$ ).

There was some evidence to suggest an increase in condom use with regular clients, using the semi-quantitative measure, in both cases (3.91 versus 3.98,  $p=0.06$ ) and controls (3.80 versus 3.93,  $p=0.05$ ). The mean number of regular clients remained unchanged in cases (0.64 versus 0.43,  $p=0.13$ ) and controls (0.55 versus 0.60,  $p=0.25$ ), although controls had more regular partners during follow-up (0.60 vs. 0.43,  $p=0.04$ ).

Social desirability or fear of being taken off ART could associate with false reporting of sexual behaviour by FSWs, and so STI rates were also examined. Combining TV and NG data in all participants, 12/102 FSW were STI-positive during the year pre-ART, compared to 8/102 post-ART ( $p=0.346$ ). This included 6/62 cases and 6/40 controls pre-ART, and 4/62 cases and 4/40 controls post-ART. The period prevalence of *N. gonorrhoea* declined from 4.6% to 1.1% in the periods before and after ART initiation ( $p=0.02$ , Wilcoxon test); this decrease was apparent in both cases (6/78, 7.7%, pre-ART; versus 1/76, 1.3%, post-ART) and controls (3/116, 2.6%, pre-ART; versus 1/110, 0.9%, post-ART).

In summary, we found no increase in sexual risk-taking in FSW who initiated ART, either using self-reported behaviour or STI rates. This was in the context of clinic and peer-based risk-reduction services offered to all participants. The latter may be important, since studies in Uganda(14) and Kenya(9, 15) showed increases in safe sex practices following ART initiation in conjunction with risk-reduction services, while in Cote d'Ivoire there was an increase in

Mawji E et al.

*ART and sexual risk behaviour in sex workers.*

1  
2  
3 unprotected sex post-ART in their absence(16). This suggests that ART should be combined with  
4  
5 risk-reduction services where possible. A prior Kenyan FSW study also reported no increased  
6  
7 risk after ART initiation(9, 15), although in that cohort less than a third of participants reported  
8  
9 >1 partner over the past week, compared to a mean of >20 casual clients in our study.  
10  
11

12  
13  
14 Several factors may potentially impact sexual practices in FSW participants, including nation-  
15  
16 wide HIV education campaigns associated with national declines in HIV prevalence(17, 18) and  
17  
18 a cohort-wide risk reduction program(19). Although we found no change in HIV risk behaviour  
19  
20 after starting ART, these factors could have masked increases in risk relative to other cohort  
21  
22 participants after ART initiation. To rule out this possibility we assessed a control group of 40  
23  
24 FSW followed over a similar time span, both HIV infected ART-naïve and HIV-uninfected, and  
25  
26 found no evidence that this was the case.  
27  
28  
29  
30  
31

32  
33  
34 In conclusion, we found no evidence for alterations in sexual behaviour after starting ART in  
35  
36 Kenyan FSWs with very high partner exchange rates. Since FSWs may act as an important core  
37  
38 HIV transmission group in the region, and since ART has been shown to reduce HIV  
39  
40 transmission(20, 21), ART provision for FSWs in conjunction with risk-reduction services  
41  
42 should be considered an important strategy to reduce HIV transmission at a population level.  
43  
44  
45  
46  
47  
48  
49  
50  
51  
52  
53  
54  
55  
56  
57  
58  
59  
60

*Mawji E et al.*

*ART and sexual risk behaviour in sex workers.*

**ACKNOWLEDGEMENTS**

We would like to thank the staff at Majengo clinic and the Kenyan AIDS Control Project for supporting the study, and the patients for their willingness to participate.

For peer review only

1  
2  
3  
4  
5  
6  
7  
8  
9  
10  
11  
12  
13  
14  
15  
16  
17  
18  
19  
20  
21  
22  
23  
24  
25  
26  
27  
28  
29  
30  
31  
32  
33  
34  
35  
36  
37  
38  
39  
40  
41  
42  
43  
44  
45  
46  
47  
48  
49  
50  
51  
52  
53  
54  
55  
56  
57  
58  
59  
60

## REFERENCES

1. Montaner JS, Hogg R, Wood E et al. The case for expanding access to highly active antiretroviral therapy to curb the growth of the HIV epidemic. *Lancet*. 2006 Aug 5;368(9534):531-6.
2. Desquilbet L, Deveau C, Goujard C et al. Increase in at-risk sexual behaviour among HIV-1-infected patients followed in the French PRIMO cohort. *Aids*. 2002 Nov 22;16(17):2329-33.
3. Ostrow DE, Fox KJ, Chmiel JS et al. Attitudes towards highly active antiretroviral therapy are associated with sexual risk taking among HIV-infected and uninfected homosexual men. *Aids*. 2002 Mar 29;16(5):775-80.
4. Bezemer D, de Wolf F, Boerlijst MC et al. A resurgent HIV-1 epidemic among men who have sex with men in the era of potent antiretroviral therapy. *Aids*. 2008 May 31;22(9):1071-7.
5. Scheer S, Chu PL, Klausner JD et al. Effect of highly active antiretroviral therapy on diagnoses of sexually transmitted diseases in people with AIDS. *Lancet*. 2001 Feb 10;357(9254):432-5.
6. Kennedy C, O'Reilly K, Medley A et al. The impact of HIV treatment on risk behaviour in developing countries: a systematic review. *AIDS Care*. 2007 Jul;19(6):707-20.
7. Chen L, Jha P, Stirling B et al. Sexual risk factors for HIV infection in early and advanced HIV epidemics in sub-Saharan Africa: systematic overview of 68 epidemiological studies. *PLoS ONE*. 2007;2(10):e1001.
8. Wilson DP, Law MG, Grulich AE et al. Relation between HIV viral load and infectiousness: a model-based analysis. *Lancet*. 2008 Jul 26;372(9635):314-20.
9. McClelland RS, Graham SM, Richardson BA et al. Treatment with antiretroviral therapy is not associated with increased sexual risk behavior in Kenyan female sex workers. *Aids*. Mar 27;24(6):891-7.
10. Plummer FA, Nagelkerke NJ, Moses S et al. The importance of core groups in the epidemiology and control of HIV-1 infection. *Aids*. 1991;5 Suppl 1:S169-76.
11. Kreiss JK, Koech D, Plummer FA et al. AIDS virus infection in Nairobi prostitutes. Spread of the epidemic to East Africa. *N Engl J Med*. 1986;314(7):414-8.
12. Lowndes CM, Alary M, Meda H et al. Role of core and bridging groups in the transmission dynamics of HIV and STIs in Cotonou, Benin, West Africa. *Sex Transm Infect*. 2002 Apr;78 Suppl 1:i69-77.
13. Jha P, Nagelkerke JD, Ngugi EN et al. Public health. Reducing HIV transmission in developing countries. *Science*. 2001 Apr 13;292(5515):224-5.
14. Bunnell R, Ekwaru JP, Solberg P et al. Changes in sexual behavior and risk of HIV transmission after antiretroviral therapy and prevention interventions in rural Uganda. *Aids*. 2006 Jan 2;20(1):85-92.
15. Luchters S, Sarna A, Geibel S et al. Safer sexual behaviors after 12 months of antiretroviral treatment in Mombasa, Kenya: a prospective cohort. *AIDS Patient Care STDS*. 2008 Jul;22(7):587-94.
16. Diabate S, Alary M, Koffi CK. Short-term increase in unsafe sexual behaviour after initiation of HAART in Cote d'Ivoire. *Aids*. 2008 Jan 2;22(1):154-6.
17. National AIDS Control Council OotP. UNGASS 2008 Country Report for Kenya. In: National AIDS Control Council N, editor.; 2008.

Mawji E et al.

*ART and sexual risk behaviour in sex workers.*

18. Kimani J, Kaul R, Nagelkerke NJ et al. Reduced rates of HIV acquisition during unprotected sex by Kenyan female sex workers predating population declines in HIV prevalence. *AIDS*. 2008 Jan 2;22(1):131-7.
19. Kaul R, Kimani J, Nagelkerke NJ et al. Reduced HIV risk-taking and low HIV incidence after enrollment and risk-reduction counseling in a sexually transmitted disease prevention trial in Nairobi, Kenya. *J Acquir Immune Defic Syndr*. 2002 May 1;30(1):69-72.
20. Attia S, Egger M, Muller M et al. Sexual transmission of HIV according to viral load and antiretroviral therapy: systematic review and meta-analysis. *AIDS*. 2009 Jul 17;23(11):1397-404.
21. Donnell D, Baeten JM, Kiarie J et al. Heterosexual HIV-1 transmission after initiation of antiretroviral therapy: a prospective cohort analysis. *Lancet*. 2010 Jun 12;375(9731):2092-8.

For peer review only

Mawji E et al.

ART and sexual risk behaviour in sex workers.

**Table 1.** Longitudinal comparison of sexual risk-taking behaviour and STI period prevalence between cases and controls

| Variable                                       | Group    | Before ART | After ART | P value |
|------------------------------------------------|----------|------------|-----------|---------|
| No. unprotected acts with casual partners/year | Cases    | 23.05      | 24.72     | p=0.57  |
|                                                | Controls | 34.08      | 29.49     | p=0.62  |
| Condom use with casual clients                 | Cases    | 3.91       | 3.98      | p=0.06  |
|                                                | Controls | 3.80       | 3.93      | p=0.05  |
| Condom use with regular clients                | Cases    | 0.24       | 0.39      | p=0.16  |
|                                                | Controls | 0.12       | 0.13      | p=0.79  |
| Number of casual clients (/day)                | Cases    | 3.93       | 4.12      | p=0.13  |
|                                                | Controls | 4.11       | 4.43      | p=0.43  |
| Number of regular clients                      | Cases    | 0.64       | 0.43      | p=0.13  |
|                                                | Controls | 0.55       | 0.60      | p=0.26  |
| NG/TV period prevalence                        | Cases    | 9.7%       | 6.5%      | p=0.53  |
|                                                | Controls | 15%        | 10%       | p=0.48  |
| NG period prevalence                           | Cases    | 7.7%       | 1.3%      | p=0.025 |
|                                                | Controls | 2.6%       | 0.9%      | p=0.32  |



**Does antiretroviral therapy initiation increase sexual risk taking in Kenyan female sex workers: a retrospective, case-control study.**

|                                 |                                                                                                                                                                                                                                                                                                                                                                                                                                                                                                                                                                                                                                                                                                                                                                                                                                                                                                                                |
|---------------------------------|--------------------------------------------------------------------------------------------------------------------------------------------------------------------------------------------------------------------------------------------------------------------------------------------------------------------------------------------------------------------------------------------------------------------------------------------------------------------------------------------------------------------------------------------------------------------------------------------------------------------------------------------------------------------------------------------------------------------------------------------------------------------------------------------------------------------------------------------------------------------------------------------------------------------------------|
| Journal:                        | <i>BMJ Open</i>                                                                                                                                                                                                                                                                                                                                                                                                                                                                                                                                                                                                                                                                                                                                                                                                                                                                                                                |
| Manuscript ID:                  | bmjopen-2011-000565.R1                                                                                                                                                                                                                                                                                                                                                                                                                                                                                                                                                                                                                                                                                                                                                                                                                                                                                                         |
| Article Type:                   | Research                                                                                                                                                                                                                                                                                                                                                                                                                                                                                                                                                                                                                                                                                                                                                                                                                                                                                                                       |
| Date Submitted by the Author:   | 22-Feb-2012                                                                                                                                                                                                                                                                                                                                                                                                                                                                                                                                                                                                                                                                                                                                                                                                                                                                                                                    |
| Complete List of Authors:       | Mawji, Elysha; University of Toronto, Medicine<br>McKinnon, Lyle; University of Toronto, Clinical Science Division; University of Nairobi, Medical Microbiology<br>Wachihi, Charles; University of Nairobi, Medical Microbiology<br>Chege, Duncan; University of Toronto, Medicine<br>Thottingal, Paul; University of Nairobi, Medical Microbiology<br>Kariri, Anthony; University of Nairobi, Medical Microbiology<br>Plummer, Francis; University of Manitoba, Medical Microbiology<br>Ball, T.; University of Manitoba, Medical Microbiology<br>Jaoko, Walter; University of Nairobi, Medical Microbiology<br>Ngugi, Elizabeth; University of Nairobi, Community Health<br>Kimani, Joshua; University of Nairobi, Medical Microbiology<br>Gelmon, Lawrence; University of Manitoba, Medical Microbiology<br>Nagelkerke, Nico; University of Manitoba, Medical Microbiology<br>Kaul, Rupert; University of Toronto, Medicine |
| <b>Primary Subject Heading</b>: | Infectious diseases                                                                                                                                                                                                                                                                                                                                                                                                                                                                                                                                                                                                                                                                                                                                                                                                                                                                                                            |
| Secondary Subject Heading:      | Epidemiology, Global health, Sexual health                                                                                                                                                                                                                                                                                                                                                                                                                                                                                                                                                                                                                                                                                                                                                                                                                                                                                     |
| Keywords:                       | EPIDEMIOLOGY, HIV & AIDS < INFECTIOUS DISEASES, Public health < INFECTIOUS DISEASES                                                                                                                                                                                                                                                                                                                                                                                                                                                                                                                                                                                                                                                                                                                                                                                                                                            |
|                                 |                                                                                                                                                                                                                                                                                                                                                                                                                                                                                                                                                                                                                                                                                                                                                                                                                                                                                                                                |

SCHOLARONE™  
Manuscripts



**STROBE 2007 (v4) checklist of items to be included in reports of observational studies in epidemiology\***  
**Checklist for cohort, case-control, and cross-sectional studies (combined)**

| Section/Topic             | Item # | Recommendation                                                                                                                                                                                                                                                                                                                                                                                                                                                         | Reported on page # |
|---------------------------|--------|------------------------------------------------------------------------------------------------------------------------------------------------------------------------------------------------------------------------------------------------------------------------------------------------------------------------------------------------------------------------------------------------------------------------------------------------------------------------|--------------------|
| Title and abstract        | 1      | (a) Indicate the study’s design with a commonly used term in the title or the abstract                                                                                                                                                                                                                                                                                                                                                                                 | 1                  |
|                           |        | (b) Provide in the abstract an informative and balanced summary of what was done and what was found                                                                                                                                                                                                                                                                                                                                                                    | 4                  |
| <b>Introduction</b>       |        |                                                                                                                                                                                                                                                                                                                                                                                                                                                                        |                    |
| Background/rationale      | 2      | Explain the scientific background and rationale for the investigation being reported                                                                                                                                                                                                                                                                                                                                                                                   | 5                  |
| Objectives                | 3      | State specific objectives, including any pre-specified hypotheses                                                                                                                                                                                                                                                                                                                                                                                                      | 5                  |
| <b>Methods</b>            |        |                                                                                                                                                                                                                                                                                                                                                                                                                                                                        |                    |
| Study design              | 4      | Present key elements of study design early in the paper                                                                                                                                                                                                                                                                                                                                                                                                                | 5-6                |
| Setting                   | 5      | Describe the setting, locations, and relevant dates, including periods of recruitment, exposure, follow-up, and data collection                                                                                                                                                                                                                                                                                                                                        | 6                  |
| Participants              | 6      | (a) <i>Cohort study</i> —Give the eligibility criteria, and the sources and methods of selection of participants. Describe methods of follow-up<br><i>Case-control study</i> —Give the eligibility criteria, and the sources and methods of case ascertainment and control selection. Give the rationale for the choice of cases and controls<br><i>Cross-sectional study</i> —Give the eligibility criteria, and the sources and methods of selection of participants | 6                  |
|                           |        | (b) <i>Cohort study</i> —For matched studies, give matching criteria and number of exposed and unexposed<br><i>Case-control study</i> —For matched studies, give matching criteria and the number of controls per case                                                                                                                                                                                                                                                 |                    |
| Variables                 | 7      | Clearly define all outcomes, exposures, predictors, potential confounders, and effect modifiers. Give diagnostic criteria, if applicable                                                                                                                                                                                                                                                                                                                               | 6                  |
| Data sources/ measurement | 8*     | For each variable of interest, give sources of data and details of methods of assessment (measurement). Describe comparability of assessment methods if there is more than one group                                                                                                                                                                                                                                                                                   | 6-7                |
| Bias                      | 9      | Describe any efforts to address potential sources of bias                                                                                                                                                                                                                                                                                                                                                                                                              | 7-8                |
| Study size                | 10     | Explain how the study size was arrived at                                                                                                                                                                                                                                                                                                                                                                                                                              | 6                  |
| Quantitative variables    | 11     | Explain how quantitative variables were handled in the analyses. If applicable, describe which groupings were chosen and why                                                                                                                                                                                                                                                                                                                                           | 6-7                |
| Statistical methods       | 12     | (a) Describe all statistical methods, including those used to control for confounding                                                                                                                                                                                                                                                                                                                                                                                  | 6                  |
|                           |        | (b) Describe any methods used to examine subgroups and interactions                                                                                                                                                                                                                                                                                                                                                                                                    | n/a                |
|                           |        | (c) Explain how missing data were addressed                                                                                                                                                                                                                                                                                                                                                                                                                            | n/a                |
|                           |        | (d) <i>Cohort study</i> —If applicable, explain how loss to follow-up was addressed<br><i>Case-control study</i> —If applicable, explain how matching of cases and controls was addressed                                                                                                                                                                                                                                                                              | n/a                |

|                          |     |                                                                                                                                                                                                              |     |
|--------------------------|-----|--------------------------------------------------------------------------------------------------------------------------------------------------------------------------------------------------------------|-----|
|                          |     | <i>Cross-sectional study</i> —If applicable, describe analytical methods taking account of sampling strategy                                                                                                 |     |
|                          |     | (e) Describe any sensitivity analyses                                                                                                                                                                        | n/a |
| <b>Results</b>           |     |                                                                                                                                                                                                              |     |
| Participants             | 13* | (a) Report numbers of individuals at each stage of study—eg numbers potentially eligible, examined for eligibility, confirmed eligible, included in the study, completing follow-up, and analysed            | 6   |
|                          |     | (b) Give reasons for non-participation at each stage                                                                                                                                                         | n/a |
|                          |     | (c) Consider use of a flow diagram                                                                                                                                                                           | n/a |
| Descriptive data         | 14* | (a) Give characteristics of study participants (eg demographic, clinical, social) and information on exposures and potential confounders                                                                     | 6   |
|                          |     | (b) Indicate number of participants with missing data for each variable of interest                                                                                                                          | 6   |
|                          |     | (c) <i>Cohort study</i> —Summarise follow-up time (eg, average and total amount)                                                                                                                             | 6   |
| Outcome data             | 15* | <i>Cohort study</i> —Report numbers of outcome events or summary measures over time                                                                                                                          |     |
|                          |     | <i>Case-control study</i> —Report numbers in each exposure category, or summary measures of exposure                                                                                                         | 6-7 |
|                          |     | <i>Cross-sectional study</i> —Report numbers of outcome events or summary measures                                                                                                                           |     |
| Main results             | 16  | (a) Give unadjusted estimates and, if applicable, confounder-adjusted estimates and their precision (eg, 95% confidence interval). Make clear which confounders were adjusted for and why they were included | 6-7 |
|                          |     | (b) Report category boundaries when continuous variables were categorized                                                                                                                                    |     |
|                          |     | (c) If relevant, consider translating estimates of relative risk into absolute risk for a meaningful time period                                                                                             |     |
| Other analyses           | 17  | Report other analyses done—eg analyses of subgroups and interactions, and sensitivity analyses                                                                                                               | n/a |
| <b>Discussion</b>        |     |                                                                                                                                                                                                              |     |
| Key results              | 18  | Summarise key results with reference to study objectives                                                                                                                                                     | 7-8 |
| Limitations              | 19  | Discuss limitations of the study, taking into account sources of potential bias or imprecision. Discuss both direction and magnitude of any potential bias                                                   | 7-8 |
| Interpretation           | 20  | Give a cautious overall interpretation of results considering objectives, limitations, multiplicity of analyses, results from similar studies, and other relevant evidence                                   | 7-8 |
| Generalisability         | 21  | Discuss the generalisability (external validity) of the study results                                                                                                                                        | 7-8 |
| <b>Other information</b> |     |                                                                                                                                                                                                              |     |
| Funding                  | 22  | Give the source of funding and the role of the funders for the present study and, if applicable, for the original study on which the present article is based                                                | 2   |

\*Give information separately for cases and controls in case-control studies and, if applicable, for exposed and unexposed groups in cohort and cross-sectional studies.

**Note:** An Explanation and Elaboration article discusses each checklist item and gives methodological background and published examples of transparent reporting. The STROBE checklist is best used in conjunction with this article (freely available on the Web sites of PLoS Medicine at <http://www.plosmedicine.org/>, Annals of Internal Medicine at <http://www.annals.org/>, and Epidemiology at <http://www.epidem.com/>). Information on the STROBE Initiative is available at [www.strobe-statement.org](http://www.strobe-statement.org).

Mawji E et al.

ART and sexual risk behaviour in sex workers.

**Does antiretroviral therapy initiation increase sexual risk taking in Kenyan female sex workers: a retrospective, case-control study.**

Elysha Mawji,<sup>1\*</sup> and Lyle R. McKinnon,<sup>1,2\*</sup> Charles Wachihi,<sup>2</sup> Duncan Chege,<sup>1</sup> Paul Thottingal,<sup>2</sup> Anthony Kariri,<sup>2</sup> Francis A. Plummer,<sup>3,4</sup> T. Blake Ball,<sup>3,4</sup> Walter Jaoko,<sup>2</sup> Elizabeth N. Ngugi,<sup>2</sup> Joshua Kimani,<sup>2,3</sup> Lawrence Gelmon,<sup>3</sup> Nico Nagelkerke,<sup>3,5</sup> Rupert Kaul<sup>1,2,6</sup>

\* These authors contributed equally to this work

<sup>1</sup> Department of Medicine, University of Toronto, Canada

<sup>2</sup> Departments of Medical Microbiology (LRM, CW, AK, WJ, JK, RK) and Community Health (EN), University of Nairobi, Nairobi, Kenya

<sup>3</sup> Department of Medical Microbiology, University of Manitoba, Winnipeg, Canada

<sup>4</sup> National Microbiology Lab, Public Health Agency of Canada, Winnipeg, Manitoba, Canada

<sup>5</sup> Department of Community Medicine, United Arab Emirates University, Al Ain, UAE

<sup>6</sup> Department of Medicine, University Health Network, Toronto, Canada

Correspondence to: Dr. Rupert Kaul  
Clinical Science Division, University of Toronto  
Medical Sciences Building #6356  
Toronto, Ontario, Canada, M5S 1A8  
Tel: (1-416) 978-8607; Fax: (1-416) 978-8765  
E-mail: [rupert.kaul@utoronto.ca](mailto:rupert.kaul@utoronto.ca)

OR

Dr. Lyle McKinnon

Mawji E et al.

ART and sexual risk behaviour in sex workers.

Clinical Science Division, University of Toronto  
Medical Sciences Building #6356  
Toronto, Ontario, Canada, M5S 1A8  
Tel: +254 723 430 009  
E-mail: [sjuisijali@gmail.com](mailto:sjuisijali@gmail.com)

Word count: Abstract: **131**

Text: **1,160**

**Conflicts of interest:** The authors do not have a commercial or other association that might pose a conflict of interest.

**Author contributions:** EM, PT, WJ, JK, LG, and RK designed the study. EM, LRM, AK, NN, and RK analyzed the data. CW and JK managed the clinical cohorts. All authors contributed to the writing and editing of the manuscript.

**Financial support:** This research was supported by grants from the Canadian Institutes of Health Research (RK; HET-85518 and MOP-89983); patient care activities and the purchase of antiretroviral drugs were funded by the President's Emergency Plan for AIDS Relief (PEPFAR). Salary support was provided by the Canadian Institutes of Health Research and the International Infectious Diseases and Global Health Training Program (LM), and the Canada Research Chair Program (RK).

**Data sharing statement:** There are no additional data available.

Mawji E et al.

ART and sexual risk behaviour in sex workers.

## ARTICLE SUMMARY

### *Article Focus:*

- Impact of starting antiretroviral therapy (ART) on sexual risk-taking behaviour in female sex workers (FSW), **which could have an important impact on HIV transmission to clients.**

### *Key Messages:*

- ART initiation was not associated with increased risk taking or STI incidence.
- Both of these declined over time, most likely as a result of risk reduction counseling.

### *Strengths and Limitations:*

- Strengths include a relevant population, longitudinal follow-up, and inclusion of biological measures of risk-taking (STI incidence).
- Limitations include relatively small study groups and limited sampling time points.

Mawji E et al.

ART and sexual risk behaviour in sex workers.

## ABSTRACT

*Objectives:* Although antiretroviral therapy (ART) prolongs life and reduces infectiousness, in some contexts it has been associated with increased sexual risk taking.

*Design:* Retrospective case-control study.

*Setting:* Nairobi-based dedicated female sex worker (FSW) clinic.

*Participants:* HIV-infected FSW before and after ART initiation (n=62); HIV-infected and uninfected control FSWs not starting ART during the same follow-up period (n=40).

*Intervention:* Initiation of ART.

*Primary outcome measures:* Self-reported condom use, client numbers, and STI incidence over the study period (before and after ART initiation in cases).

*Results:* Sexual risk-taking behaviour with casual clients did not increase after ART initiation; condom use increased and STI incidence decreased in both cases and controls, likely due to successful cohort-wide HIV prevention efforts.

*Conclusions:* ART provision was not associated with increases in unsafe sex **in this FSW population.**

Mawji E et al.

ART and sexual risk behaviour in sex workers.

## MAIN TEXT

Female sex workers (FSWs) play a key role in HIV epidemic spread in sub-Saharan Africa(1) during both early and late epidemic phases(2) due to multiple partners, high rates of HIV and sexually transmitted infections (STIs), and in many instances their ability to negotiate safer sex practices are compromised(1, 3, 4). HIV prevention in this group may be the highest impact intervention in developing countries(5). Therefore, ART programs targeting FSW may not only preserve life, but also reduce HIV transmission at a population level. However, it will be critical to ensure that sexual disinhibition does not counteract these beneficial effects.

ART provision appears to have contradictory effects on HIV transmission. While ART reduces blood and genital tract viral load, and therefore infectiousness(6), it has also been associated with reduced safe sex practices(7-9) and increases in STI incidence in some settings(10). **Reasons for behavioural disinhibition could be several, including a feeling of improved health after ART initiation.** Although this increase has not been the experience to date in resource-poor countries(11), it could become an issue as access expands(2), and **further studies are needed to understand the extent to which these initial observations are generalizable.** Mathematical models suggest that if safe sex practices are not maintained, then HIV transmission may increase despite ART-associated reductions in genital tract virus levels(12). A recent study in Kenyan sex workers with relatively low rates of partner exchange showed no change in risk-taking following ART(13), but these findings need to be confirmed in a high partner exchange setting.

Mawji E et al.

ART and sexual risk behaviour in sex workers.

**In the current study, we assessed the impact of ART** on sexual behaviour within an established cohort of FSWs from Nairobi, Kenya in a retrospective case-control study. Institutional Review Boards at Kenyatta National Hospital, and the Universities of Manitoba and Toronto approved the study, and all participants gave written, informed consent prior to participation. Each participant completed a standardized questionnaire and physical exam every six months. Self-reported risk-taking data included the number of clients (casual and regular) and condoms used per week. Percentage condom use with casual clients was calculated from reported client and condom numbers, with maximum usage arbitrarily set at 98%. Risk reduction services provided to all participants included peer and clinic-based counseling, provision of free condoms, and STI management according to Kenyan guidelines. Non-parametric statistical comparisons between groups and within an individual were performed using PASWStatistics 18.0. **Self-reported sexual behaviour data were collected at two time-points six months apart prior to ART initiation, and at two time-points after: means of continuous variables were calculated for each period, and changes within an individual compared by using the Wilcoxon signed rank test. Categorical variables were compared by Mann-Whitney.**

## **RESULTS**

All HIV-infected FSWs initiating ART during 2001-2006 with  $\geq 1$  year of follow-up were included as cases (n=62). Since sexual risk-taking may change over time in the cohort as a whole, HIV-infected ART-naïve and HIV-uninfected FSWs enrolled in the cohort for a similar duration were selected as controls (n=20 each). Cases and controls were generally comparable at baseline, but cases reported higher condom use with casual clients (mean 97.8% vs. 95.7%;  $p=0.01$ ) and had a trend to a lower number of unprotected sex acts over the past year (23.0 vs.



Mawji E et al.

ART and sexual risk behaviour in sex workers.

34.1;  $p=0.14$ , Table 1). The proportion of participants reporting a regular client was similar (cases 58% vs. controls 65%;  $p=0.62$ ), and condoms were rarely used with regular clients (cases 23.2% vs. controls 9.6%;  $p=0.13$ ).

No significant change in casual client numbers was seen during the year after starting ART in cases (19.9/week pre- vs. 21.9 post-ART;  $p=0.17$ , **Table 2**), in condom use with casual clients (97.8% both pre- and post-ART;  $p=0.66$ ), or in the number of unprotected sex acts with casual clients (23.7/year pre- vs. 24.7 post-ART;  $p=0.26$ ). Condom use increased in controls (mean 95.7% vs. 97.6%;  $p=0.14$ ), so that although casual client numbers increased over the study period from 19.4 to 24.5 per week ( $p=0.002$ ), there was a trend to reduced unprotected sex acts with casual clients during the latter year (34.1 vs. 29.5;  $p=0.10$ ).

There was some evidence to suggest an increase in condom use with regular clients in both cases (3.91 versus 3.98,  $p=0.06$ ) and controls (3.80 versus 3.93,  $p=0.05$ ). The mean number of regular clients remained unchanged in cases (0.64 versus 0.43,  $p=0.13$ ) and controls (0.55 versus 0.60,  $p=0.25$ ), although controls had more regular partners during follow-up (0.60 vs. 0.43,  $p=0.04$ ). **It should be noted that condom use with regular partners remained infrequent in all groups; specific interventions to increase this in FSW populations could have important public health benefits.**

Social desirability or fear of being taken off ART could associate with false reporting of sexual behaviour by FSWs, and so STI rates were also examined. Combining *Trichomonas vaginalis* (TV) and *Neisseria gonorrhoea* (NG) data in all participants, 12/102 FSW were STI-positive

Mawji E et al.

ART and sexual risk behaviour in sex workers.

1  
2  
3 during the year pre-ART, compared to 8/102 post-ART ( $p=0.346$ ). This included 6/62 cases and  
4  
5 6/40 controls pre-ART, and 4/62 cases and 4/40 controls post-ART. The period prevalence of *N.*  
6  
7  
8 *gonorrhoea* declined from 4.6% to 1.1% in the periods before and after ART initiation ( $p=0.02$ ,  
9  
10 Wilcoxon test); this decrease was apparent in both cases (6/78, 7.7%, pre-ART; versus 1/76,  
11  
12 1.3%, post-ART) and controls (3/116, 2.6%, pre-ART; versus 1/110, 0.9%, post-ART).  
13  
14

15  
16  
17 In summary, we found no increase in sexual risk-taking in FSW who initiated ART, either using  
18  
19 self-reported behaviour or STI rates. This was in the context of clinic and peer-based risk-  
20  
21 reduction services offered to all participants. The latter may be important, since studies in  
22  
23 Uganda(14) and Kenya(13, 15) showed increases in safe sex practices following ART initiation  
24  
25 in conjunction with risk-reduction services, while in Cote d'Ivoire there was an increase in  
26  
27 unprotected sex post-ART in their absence(16). This suggests that ART should be combined with  
28  
29 risk-reduction services where possible. A prior Kenyan FSW study also reported no increased  
30  
31 risk after ART initiation(13, 15), although in that cohort less than a third of participants reported  
32  
33  $>1$  partner over the past week, compared to a mean of  $>20$  casual clients in our study.  
34  
35  
36  
37  
38  
39

40  
41 Several factors may potentially impact sexual practices in FSW participants, including nation-  
42  
43 wide HIV education campaigns **that could be associated** with national declines in HIV  
44  
45 prevalence(17, 18) and a cohort-wide risk reduction program(19). Although we found no change  
46  
47 in HIV risk behaviour after starting ART, these factors could have masked increases in risk  
48  
49 relative to other cohort participants after ART initiation. To rule out this possibility we assessed  
50  
51 a control group of 40 FSW followed over a similar time span, both HIV infected ART-naïve and  
52  
53 HIV-uninfected, and found no evidence that this was the case.  
54  
55  
56  
57  
58  
59  
60

Mawji E et al.

ART and sexual risk behaviour in sex workers.

1  
2  
3  
4  
5  
6 In conclusion, we found no evidence for alterations in sexual behaviour after starting ART in  
7  
8 Kenyan FSWs with very high partner exchange rates. **FSWs through their profession may act**  
9  
10 **as an important core HIV transmission group in the region.** Since ART has been shown to  
11  
12 reduce HIV transmission(20, 21), ART provision for FSWs in conjunction with risk-reduction  
13  
14 services should be considered an important strategy to reduce HIV transmission at a population  
15  
16 level.  
17  
18  
19  
20  
21  
22  
23  
24  
25  
26  
27  
28  
29  
30  
31  
32  
33  
34  
35  
36  
37  
38  
39  
40  
41  
42  
43  
44  
45  
46  
47  
48  
49  
50  
51  
52  
53  
54  
55  
56  
57  
58  
59  
60

1  
2  
3  
4  
5  
6  
7  
8  
9  
10  
11  
12  
13  
14  
15  
16  
17  
18  
19  
20  
21  
22  
23  
24  
25  
26  
27  
28  
29  
30  
31  
32  
33  
34  
35  
36  
37  
38  
39  
40  
41  
42  
43  
44  
45  
46  
47  
48  
49  
50  
51  
52  
53  
54  
55  
56  
57  
58  
59  
60

*Mawji E et al.*

*ART and sexual risk behaviour in sex workers.*

## ACKNOWLEDGEMENTS

We would like to thank the staff at Majengo clinic and the Kenyan AIDS Control Project for supporting the study, and the patients for their willingness to participate.

For peer review only

## REFERENCES

1. Plummer FA, Nagelkerke NJ, Moses S, Ndinya-Achola JO, Bwayo J, Ngugi E. The importance of core groups in the epidemiology and control of HIV-1 infection. *Aids*. 1991;5 Suppl 1:S169-76.
2. Chen L, Jha P, Stirling B, Sgaier SK, Daid T, Kaul R, et al. Sexual risk factors for HIV infection in early and advanced HIV epidemics in sub-Saharan Africa: systematic overview of 68 epidemiological studies. *PLoS ONE*. 2007;2(10):e1001.
3. Kreiss JK, Koech D, Plummer FA, Holmes KK, Lightfoote M, Piot P, et al. AIDS virus infection in Nairobi prostitutes. Spread of the epidemic to East Africa. *N Engl J Med*. 1986;314(7):414-8.
4. Lowndes CM, Alary M, Meda H, Gnintoungbe CA, Mukenge-Tshibaka L, Adjovi C, et al. Role of core and bridging groups in the transmission dynamics of HIV and STIs in Cotonou, Benin, West Africa. *Sex Transm Infect*. 2002 Apr;78 Suppl 1:i69-77.
5. Jha P, Nagelkerke JD, Ngugi EN, Prasada Rao JV, Willbond B, Moses S, et al. Public health. Reducing HIV transmission in developing countries. *Science*. 2001 Apr 13;292(5515):224-5.
6. Montaner JS, Hogg R, Wood E, Kerr T, Tyndall M, Levy AR, et al. The case for expanding access to highly active antiretroviral therapy to curb the growth of the HIV epidemic. *Lancet*. 2006 Aug 5;368(9534):531-6.
7. Desquilbet L, Deveau C, Goujard C, Hubert JB, Derouineau J, Meyer L. Increase in at-risk sexual behaviour among HIV-1-infected patients followed in the French PRIMO cohort. *Aids*. 2002 Nov 22;16(17):2329-33.
8. Ostrow DE, Fox KJ, Chmiel JS, Silvestre A, Visscher BR, Vanable PA, et al. Attitudes towards highly active antiretroviral therapy are associated with sexual risk taking among HIV-infected and uninfected homosexual men. *Aids*. 2002 Mar 29;16(5):775-80.
9. Bezemer D, de Wolf F, Boerlijst MC, van Sighem A, Hollingsworth TD, Prins M, et al. A resurgent HIV-1 epidemic among men who have sex with men in the era of potent antiretroviral therapy. *Aids*. 2008 May 31;22(9):1071-7.
10. Scheer S, Chu PL, Klausner JD, Katz MH, Schwarcz SK. Effect of highly active antiretroviral therapy on diagnoses of sexually transmitted diseases in people with AIDS. *Lancet*. 2001 Feb 10;357(9254):432-5.
11. Kennedy C, O'Reilly K, Medley A, Sweat M. The impact of HIV treatment on risk behaviour in developing countries: a systematic review. *AIDS Care*. 2007 Jul;19(6):707-20.
12. Wilson DP, Law MG, Grulich AE, Cooper DA, Kaldor JM. Relation between HIV viral load and infectiousness: a model-based analysis. *Lancet*. 2008 Jul 26;372(9635):314-20.
13. McClelland RS, Graham SM, Richardson BA, Peshu N, Masese LN, Wanje GH, et al. Treatment with antiretroviral therapy is not associated with increased sexual risk behavior in Kenyan female sex workers. *Aids*. Mar 27;24(6):891-7.
14. Bunnell R, Ekwaru JP, Solberg P, Wamai N, Bikaako-Kajura W, Were W, et al. Changes in sexual behavior and risk of HIV transmission after antiretroviral therapy and prevention interventions in rural Uganda. *Aids*. 2006 Jan 2;20(1):85-92.
15. Luchters S, Sarna A, Geibel S, Chersich MF, Munyao P, Kaai S, et al. Safer sexual behaviors after 12 months of antiretroviral treatment in Mombasa, Kenya: a prospective cohort. *AIDS Patient Care STDS*. 2008 Jul;22(7):587-94.

Mawji E et al.

*ART and sexual risk behaviour in sex workers.*

16. Diabate S, Alary M, Koffi CK. Short-term increase in unsafe sexual behaviour after initiation of HAART in Cote d'Ivoire. *Aids*. 2008 Jan 2;22(1):154-6.
17. National AIDS Control Council OotP. UNGASS 2008 Country Report for Kenya. In: National AIDS Control Council N, editor.; 2008.
18. Kimani J, Kaul R, Nagelkerke NJ, Luo M, MacDonald KS, Ngugi E, et al. Reduced rates of HIV acquisition during unprotected sex by Kenyan female sex workers predating population declines in HIV prevalence. *AIDS*. 2008 Jan 2;22(1):131-7.
19. Kaul R, Kimani J, Nagelkerke NJ, Fonck K, Keli F, MacDonald KS, et al. Reduced HIV risk-taking and low HIV incidence after enrollment and risk-reduction counseling in a sexually transmitted disease prevention trial in Nairobi, Kenya. *J Acquir Immune Defic Syndr*. 2002 May 1;30(1):69-72.
20. Attia S, Egger M, Muller M, Zwahlen M, Low N. Sexual transmission of HIV according to viral load and antiretroviral therapy: systematic review and meta-analysis. *AIDS*. 2009 Jul 17;23(11):1397-404.
21. Donnell D, Baeten JM, Kiarie J, Thomas KK, Stevens W, Cohen CR, et al. Heterosexual HIV-1 transmission after initiation of antiretroviral therapy: a prospective cohort analysis. *Lancet*. 2010 Jun 12;375(9731):2092-8.

**TABLE 1.** Baseline characteristics of study groups.

| Characteristic<br>(median, range)   | Cases starting ART<br>(N=62) | HIV-infected<br>controls (N=20) | HIV-uninfected<br>controls (N=20) |
|-------------------------------------|------------------------------|---------------------------------|-----------------------------------|
| Age (years)                         | 41 (26-61)                   | 38 (27-48)                      | 41 (27-61)                        |
| Duration of sex<br>work (years)     | 14 (2-41)                    | 13 (1-28)                       | 11 (2-33)                         |
| Clients per week                    | 16 (4-80)                    | 20 (3-51)                       | 19 (2-45)                         |
| Condom use (%)                      | 98 (86-98)**                 | 98 (75-98)                      | 98 (50-98)                        |
| Unprotected sex<br>acts (past year) | 16 (4-160)                   | 21 (3-195)                      | 24 (4-171)                        |
| Regular partner<br>(proportion)     | 36/62 (58%)                  | 12/20 (60%)                     | 14/20 (70%)                       |
| Condom with<br>regular partner (%)  | 23                           | 8                               | 11                                |
| CD4 T cell count                    | 205 (70-1028)**              | 557 (243-1082)                  | 1100 (631-1692)                   |

\*\*Mann-Whitney  $P \leq 0.01$  for cases vs. controls.

**TABLE 2.** Longitudinal assessment of risk-taking and STI prevalence in FSW over time.

| Variable                                       | Before ART | After ART | P value |
|------------------------------------------------|------------|-----------|---------|
| <b>CASES</b>                                   |            |           |         |
| No. unprotected acts with casual partners/year | 23.05      | 24.72     | 0.57    |
| Condom use with casual clients (Scale 1-4)     | 3.91       | 3.98      | 0.06    |
| Condom use with regular clients (Scale 1-4)    | 0.24       | 0.39      | 0.16    |
| Mean Number of casual clients per day          | 3.93       | 4.12      | 0.13    |
| Mean Number of regular clients per day         | 0.64       | 0.43      | 0.13    |
| NG/TV period prevalence (%)                    | 9.7%       | 6.5%      | 0.53    |
| NG period prevalence (%)                       | 7.7%       | 1.3%      | 0.03    |
| <b>CONTROLS</b>                                |            |           |         |
| No. unprotected acts with casual partners/year | 34.08      | 29.49     | 0.62    |
| Condom use with casual clients (Scale 1-4)     | 3.80       | 3.93      | 0.05    |
| Condom use with regular clients (Scale 1-4)    | 0.12       | 0.13      | 0.79    |
| Mean Number of casual clients per day          | 4.11       | 4.43      | 0.43    |
| Mean Number of regular clients per day         | 0.55       | 0.60      | 0.26    |
| NG/TV period prevalence (%)                    | 15%        | 10%       | 0.48    |
| NG period prevalence (%)                       | 2.6%       | 0.9%      | 0.32    |
